# Supplementary material
Source: Springer Nature journal article supplement (https://www.springermedizin.de/resource/supplementary/12936_2011_1857_MOESM11_ESM.pdf/9541930)

cir subfamily 1

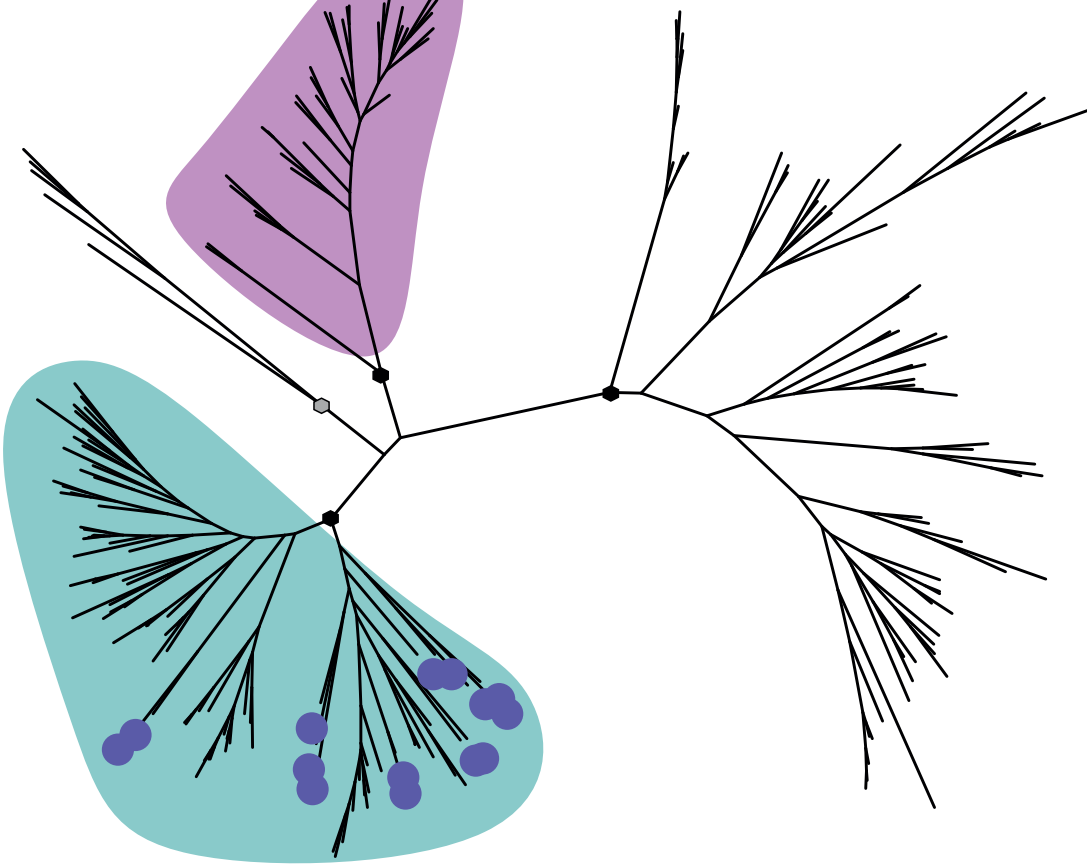

cir subfamily 2

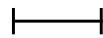

0.5

Supplement: MOESM11 [file 9541930]
